# Supplementary material for: Applying Unconventional Secretion in Ustilago maydis for the Export of Functional Nanobodies
Source: Int J Mol Sci. 2017 Apr 29;18(5):937. doi: 10.3390/ijms18050937 (PMC5454850; doi:10.3390/ijms18050937)
Supplement: Supplementary file 1 [file ijms-18-00937-s001.pdf]

# Supplementary Materials: Applying Unconventional Secretion in *Ustilago maydis* for the Export of Functional Nanobodies

Marius Terfrüchte, Michèle Reindl, Silke Jankowski, Parveen Sarkari, Michael Feldbrügge and Kerstin Schipper

**Table S1.** Sequences of genes optimized according to the context-dependent dicodon usage of *Ustilago maydis* (*U. maydis*).

| Encoded protein                                                      | Codon-optimized gene sequence (5'–3')                                                                                                                                                                                                                                                                                                                                                                                                                                                                                                                                                                                                                                                                                                                                                                                                                                 | Company                           |
|----------------------------------------------------------------------|-----------------------------------------------------------------------------------------------------------------------------------------------------------------------------------------------------------------------------------------------------------------------------------------------------------------------------------------------------------------------------------------------------------------------------------------------------------------------------------------------------------------------------------------------------------------------------------------------------------------------------------------------------------------------------------------------------------------------------------------------------------------------------------------------------------------------------------------------------------------------|-----------------------------------|
| anti-Gfp nanobody ( $\alpha$ GfpNB) [1]                              | <p>ATGCGCCGACGTCCAGCTCGTCGAGTCGGGTGGTGCGCTCG<br/> TCCAGCCCGGTGGCTCGCTGCGTCTCTCGTGCGCCGCTCG<br/> GGCTTCCCCGTCAACCGCTACTCGATGCGATGGTACCGTC<br/> AGGCGCCTGGCAAGGAGCGCGAGTGGGTCGCCGGCATGT<br/> CGTCGGCCCGGTGACCGATCGTCGTACGAGGACTCGGTCAA<br/> GGGTCGCTTCACCATCTCGCGCGACGACGCTCGCAACACC<br/> GTCTACCTCCAGATGAACTCGTCAAGCCCGAGGACACCG<br/> CCGTCTACTACTGCAACGTCAACGTCGGCTTCGAGTACTG<br/> GGTCAGGGCACCCAGGTCACCGTCTCGTCGA</p> <p>ATGCGCGCCCATCACCACCATCACCACCATCACCACCAT<br/> CATGGATCGGGTGGTGGTCTGGTCCAGGTCGGTGGCTCGC<br/> TGGTCTCTCGTGCGTCTCGTCTCGGGCTCGGACATCTCGGGC<br/> ATCGCGATGGGCTGGTACCGTCAGGCTCCCGGCAAGCGTC<br/> GCGAGATGGTCGCCGACATCTTCTCGGGTGGCTCGACCGA<br/> CTACGCCGGCTCGGTCAAGGGTCGCTTACCATCTCGCGC<br/> GACAACGCCAAGAAGACCTCGTACCTCCAGATGAACAAC<br/> GTCAAGCCCGAGGACACCGGTGTCTACTACTGCCGTCTCT<br/> ACGGCTCGGGCGACTACTGGGGTCAGGGCACCCAGGTCA<br/> CCGTCTCGTCG</p> | GeneArt (Thermo Fisher)           |
| anti-botulinum toxin A nanobody ( $\alpha$ BoNTANB) [2] <sup>1</sup> | <p>ATGCGCGCCCATCACCACCATCACCACCATCACCACCAT<br/> CATGGATCGGGTGGTGGTCTGGTCCAGGTCGGTGGCTCGC<br/> TGGTCTCTCGTGCGTCTCGTCTCGGGCTCGGACATCTCGGGC<br/> ATCGCGATGGGCTGGTACCGTCAGGCTCCCGGCAAGCGTC<br/> GCGAGATGGTCGCCGACATCTTCTCGGGTGGCTCGACCGA<br/> CTACGCCGGCTCGGTCAAGGGTCGCTTACCATCTCGCGC<br/> GACAACGCCAAGAAGACCTCGTACCTCCAGATGAACAAC<br/> GTCAAGCCCGAGGACACCGGTGTCTACTACTGCCGTCTCT<br/> ACGGCTCGGGCGACTACTGGGGTCAGGGCACCCAGGTCA<br/> CCGTCTCGTCG</p>                                                                                                                                                                                                                                                                                                                                                                                                                        | Integrated DNA Technologies, Inc. |

<sup>1</sup> The synthesized sequence includes a 10× Histidin tag (His tag; bold font) which was also codon-optimized for use in *U. maydis*. The actual start of the anti-botulinum toxin A nanobody ( $\alpha$ BoNTANB) sequence is directly behind the His tag.

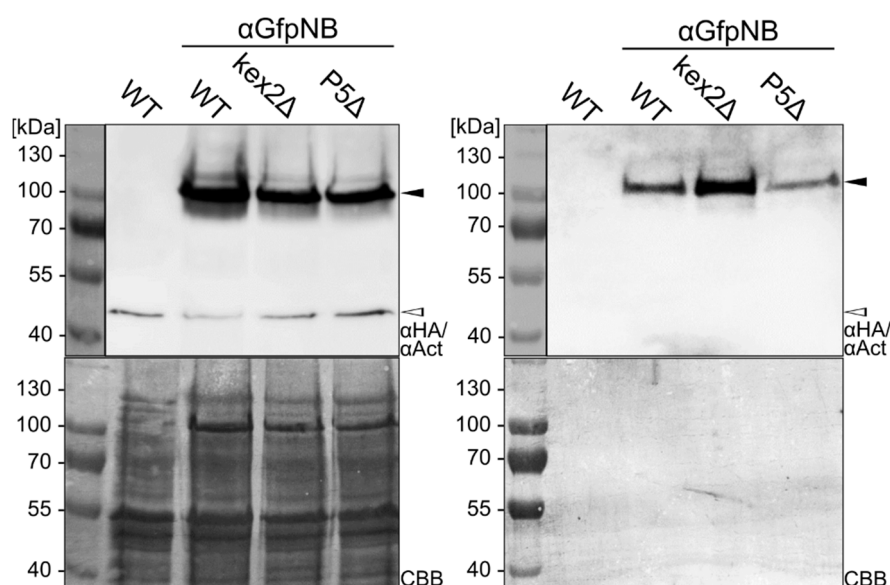

**Figure S1.** Expression and unconventional secretion of an anti-Gfp nanobody ( $\alpha$ GfpNB) in *U. maydis*. The figure is a replicate of Figure panels 1B and 1C. The protein ladder has additionally been

included to clearly visualize the band sizes and a larger part of the Coomassie Brilliant Blue (CBB) stained membranes is provided.

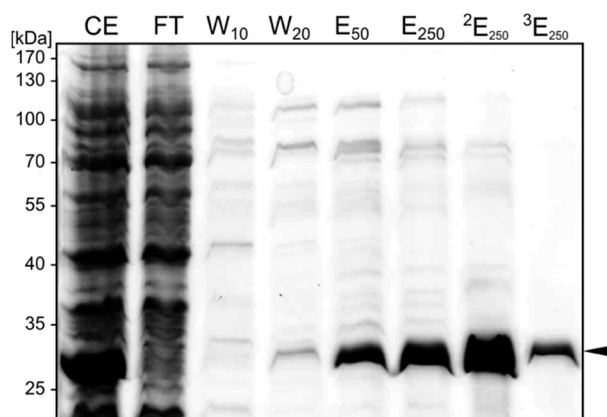

**Figure S2.** Expression and immobilized metal ion affinity chromatography (IMAC) purification of His-tagged Gfp ( $Gfp^H$ ) produced in *Escherichia coli*. Identical volumes of the fractions were subjected to SDS-PAGE with subsequent CBB staining. CE, cell extract; FT, flow through; W, wash steps; E, elution fractions. Subscripts indicate concentrations of imidazole.  $Gfp^H$  is indicated with an arrowhead.

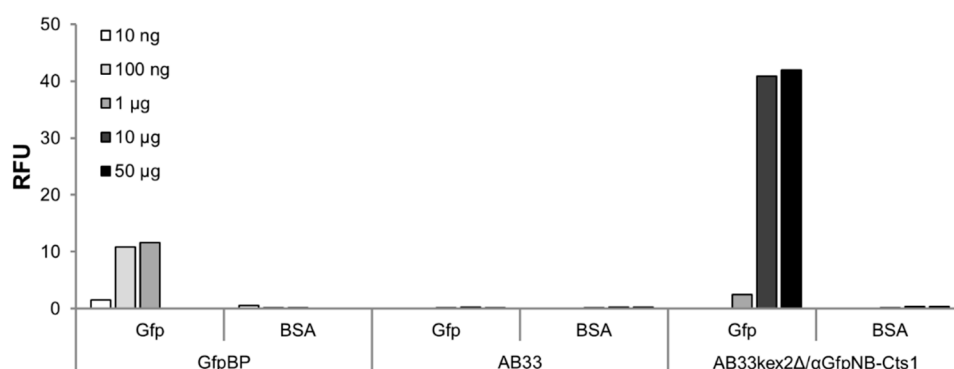

**Figure S3.** Positive control for nanobody enzyme-linked immunosorbent assay (ELISA) using commercial Gfp-binding protein. Detection of purified Gfp-strep-tag control protein ( $Gfp^S$ ; IBA) in ELISA assays using indicated amounts of total cell extracts of strains AB33 (no nanobody) and AB33kex2 $\Delta$ / $\alpha GfpNB$ -Cts1. As a positive control, detection was also performed using indicated amounts of commercial Gfp-binding protein (GfpBP, ChromoTek). Saturated signals were detected with 100 ng purified GfpBP and 10  $\mu g$  *U. maydis* cell extracts containing  $\alpha GfpNB$ -Cts1. Note that due to the presence of a C-terminal his-tag in GfpBP, the experimental setup has been changed and detection was performed with an antibody directed against the His tag ( $\alpha His$ ).

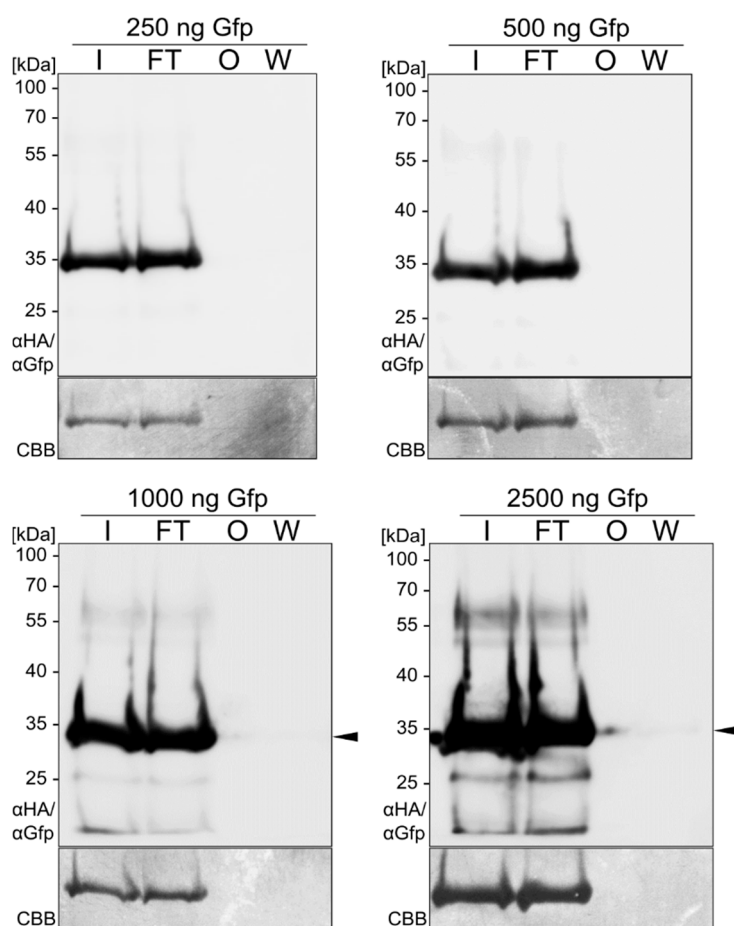

**Figure S4.** Titration of Gfp<sup>H</sup> to determine suitable loading for Gfp-trap experiments. Indicated amounts of purified Gfp<sup>H</sup> were incubated with chitin resin. The experimental setup was identical to the actual nanotrap experiments (Figure 5) just lacking cell extracts. The figure shows Western blots using primary  $\alpha$ Gfp and  $\alpha$ HA antibodies. The membrane was stained with CBB after detection. Increasing the Gfp<sup>H</sup> amount to 1.0  $\mu$ g leads to inefficient washing and hence, unspecific bands in the elution fraction (indicated by arrowheads). Hence, no more than 500 ng input protein should be used in Gfp-trap experiments. I, input; FT, flow through; O, elution; W, last wash step.

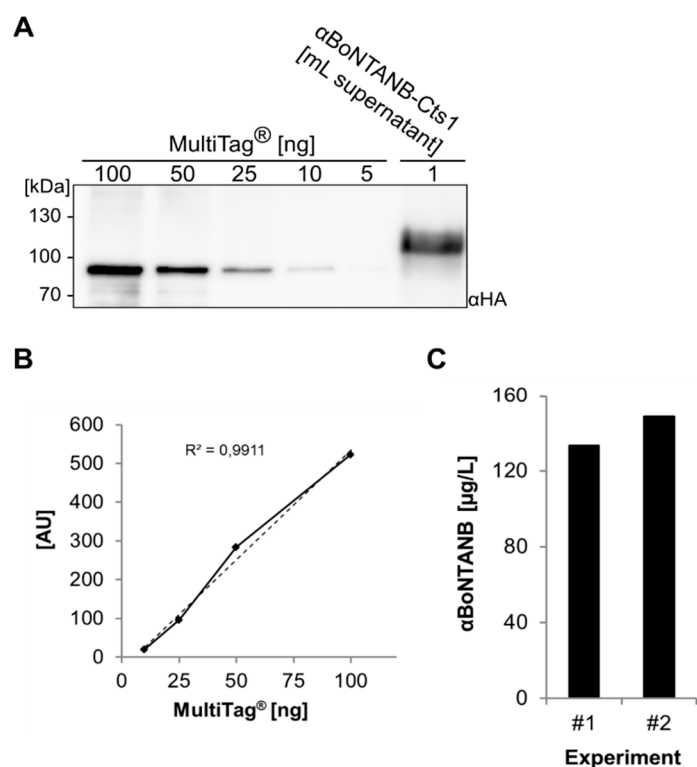

**Figure S5.** Quantification of  $\alpha$ BoNTANB-Cts1 in *U. maydis* supernatants. (A) Representative Western blot of defined amounts of MultiTag<sup>®</sup> standard protein and trichloroacetic acid (TCA) precipitated supernatants of *U. maydis* AB33kex2 $\Delta$ / $\alpha$ BoNTANB-Cts1 harvested 9 h post inoculation; (B) Standard curve from densitometric analysis of the MultiTag<sup>®</sup> standard protein depicted in A; (C) Amounts of  $\alpha$ BoNTANB-Cts1 in  $\mu\text{g/L}$  calculated from Western blot results of 1 mL precipitated AB33kex2 $\Delta$ / $\alpha$ BoNTANB-Cts1 supernatant. The experiment has been performed as a biological duplicate.

## References (Supplementary Material)

1. Rothbauer, U.; Zolghadr, K.; Tillib, S.; Nowak, D.; Schermelleh, L.; Gahl, A.; Backmann, N.; Conrath, K.; Muyldermans, S.; Cardoso, M.C.; et al. Targeting and tracing antigens in live cells with fluorescent nanobodies. *Nature Methods* **2006**, *3*, 887–889.
2. Mukherjee, J.; Tremblay, J.M.; Leysath, C.E.; Ofori, K.; Baldwin, K.; Feng, X.; Bedenice, D.; Webb, R.P.; Wright, P.M.; Smith, L.A.; et al. A novel strategy for development of recombinant antitoxin therapeutics tested in a mouse botulism model. *PLoS ONE* **2012**, *7*, e29941.
